# Supplementary material for: Logic programming reveals alteration of key transcription factors in multiple myeloma
Source: PubMed Central journal article supplement (PMC5569101; doi:10.1038/s41598-017-09378-9), 2017-08-23
Supplement: 41598_2017_9378_MOESM1_ESM.pdf [file 41598_2017_9378_MOESM1_ESM.pdf]

# Supplementary material: Logic programming reveals alteration of key transcription factors in multiple myeloma

Bertrand Miannay<sup>1,2</sup>, Stéphane Minvielle<sup>2,3</sup>, Olivier Roux<sup>1</sup>, Pierre Drouin<sup>1</sup>, Hervé Avet-Loiseau<sup>4</sup>, Catherine Guérin-Charbonnel<sup>2,5</sup>, Wilfried Gouraud<sup>2,5</sup>, Michel Attal<sup>6</sup>, Thierry Facon<sup>7</sup>, Nikhil C Munshi<sup>8</sup>, Philippe Moreau<sup>2,3</sup>, Loïc Campion<sup>2,5</sup>, Florence Magrangeas<sup>2,3,\*</sup>, and Carito Guziolowski<sup>1,\*</sup>

<sup>1</sup>LS2N UMR 6004, École Centrale de Nantes

<sup>2</sup>CRCINA, INSERM, CNRS, Université d'Angers, Université de Nantes, Nantes, France

<sup>3</sup>CHU de Nantes, Nantes, France

<sup>4</sup>Unit for Genomics in Myeloma, IUC-Oncopole; and CRCT INSERM 1037, Toulouse, France

<sup>5</sup>Institut de Cancérologie de l'Ouest, Nantes, France

<sup>6</sup>Department of Hematology, IUC, Toulouse, France

<sup>7</sup>Department of Hematology, CHU, Lille, France

<sup>8</sup>Lebow Institute of Myeloma Therapeutics and Jerome Lipper Multiple Myeloma Center, Dana-Farber Cancer Institute, Harvard Medical School, Boston, MA, 02115, USA Boston Veterans Administration Healthcare System, West Roxbury, MA, 02132, USA

\*Corresponding authors: Carito.Guziolowski@ls2n.fr and Florence.Magrangeas@univ-nantes.fr

## Data discretization method

In order to discretize the measured gene expression in three classes: over-expression (+), under-expression (-), and invariant (0) with respect to the normal plasma cells (NPC) cells, we used a combination of two thresholds  $k_1$  and  $k_2$ . In Fig. 1 we illustrate this selection.

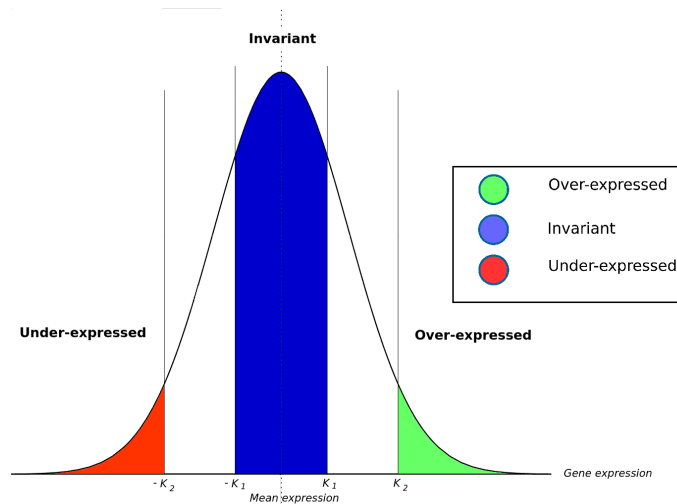

Figure 1: Discretization method based on mean expression with two symmetric thresholds

The values selected for  $k_1$  and  $k_2$  were:

- $k_1 \in \{0, 0.01, 0.02, 0.03, 0.04, 0.05, 0.1, 0.15, 0.2, 0.3\}$  for invariant genes.
- $k_2 \in \{0.2, 0.4, 0.6, 0.8, 1, 1.2, 1.4, 1.6, 1.8, 2, 2.2, 2.4, 2.6, 2.8, 3\}$  for over/under-expressed genes.

# Computing the Precision of IGGY sign-projection

Once the data was discretized, we selected the best combination of  $k_1$  and  $k_2$  by running IGGY on the network selecting only 50% of the gene expression discretized data, generating sign-projections (predictions), and searching to correctly predict the sign of the other 50% of the data. Since the sign projections outputted by IGGY can be uncertain (weak) values such as CHANGE, Not+, and Not-, we decided to weight the correctness of such weak predictions with a lower (0.5) score than the one used to weight the strong predictions (+, -, 0). In Table 1 we show the weights used to compute the total precision. These weights are 1 for the true strong predictions, 0.5 for the weaks, and 0.3 for the last in order to take into account the informativeness of each class of predictions.

Table 1: Precision matrix used for the computation of precisions.

| Predicted projections | Discretized Measured Sign |     |     |
|-----------------------|---------------------------|-----|-----|
|                       | +                         | -   | 0   |
| +                     | 1                         | 0   | 0   |
| -                     | 0                         | 1   | 0   |
| 0                     | 0                         | 0   | 1   |
| CHANGE                | 0.5                       | 0.5 | 0   |
| Not+                  | 0                         | 0.5 | 0.5 |
| Not-                  | 0.5                       | 0   | 0.5 |
| ?                     | 0.3                       | 0.3 | 0.3 |

## Precision repartition for each threshold combination

We removed the  $k_1 - k_2$  combinations that led to datasets where a gene was assigned in more than 50% of the MC or NPC profiles the same sign. We computed the precision of the prediction of sign-projections with the rest of  $k_1 - k_2$  combinations and the precision results are shown in Fig. 2. We can see that all precisions are situated in the range of 29% to 42%. The combination of thresholds that obtained the best precision was  $k_1 = 0.03$  and  $k_2 = 0.2$ .

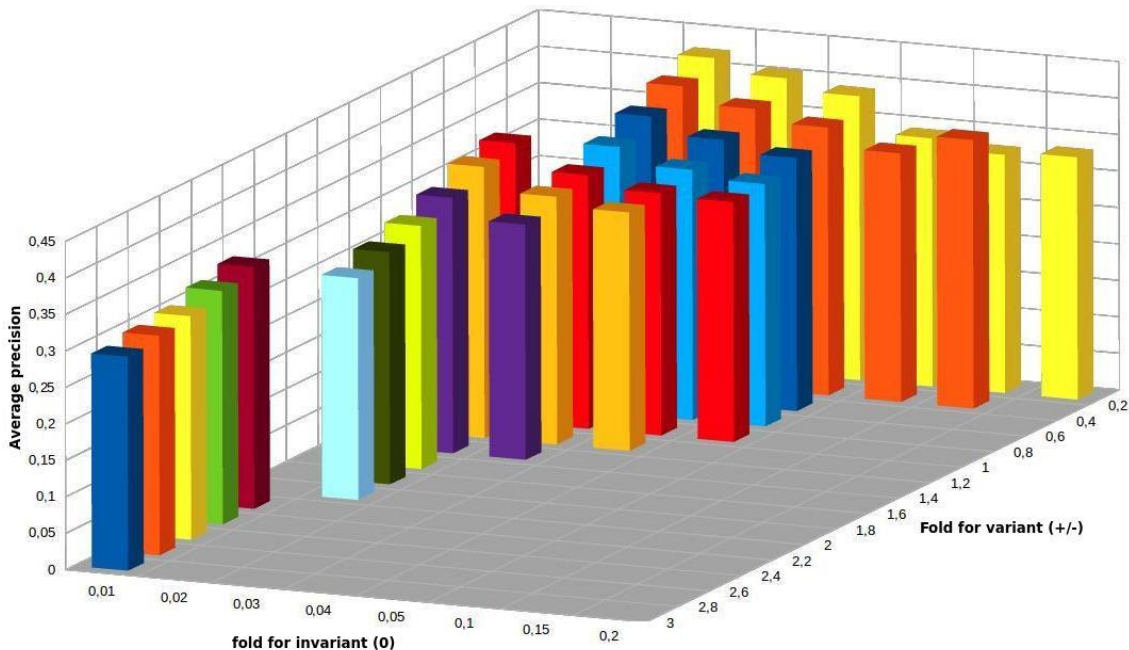

Figure 2: Precision repartition for each threshold combination

## Comparison with K-means discretization

To validate our discretization method, we compared the precision obtained with the  $k_1 - k_2$  combination choosed previously with a k-means clustering, with  $k = 3$  (-,0,+). These precisions are shown in Fig. 3. A two tailed t.test between these two precisions repartitions gave us a p-value lower than  $2.2e-16$  allowing us to conclude to the efficiency of our discretization approach compared to k-means discretization.

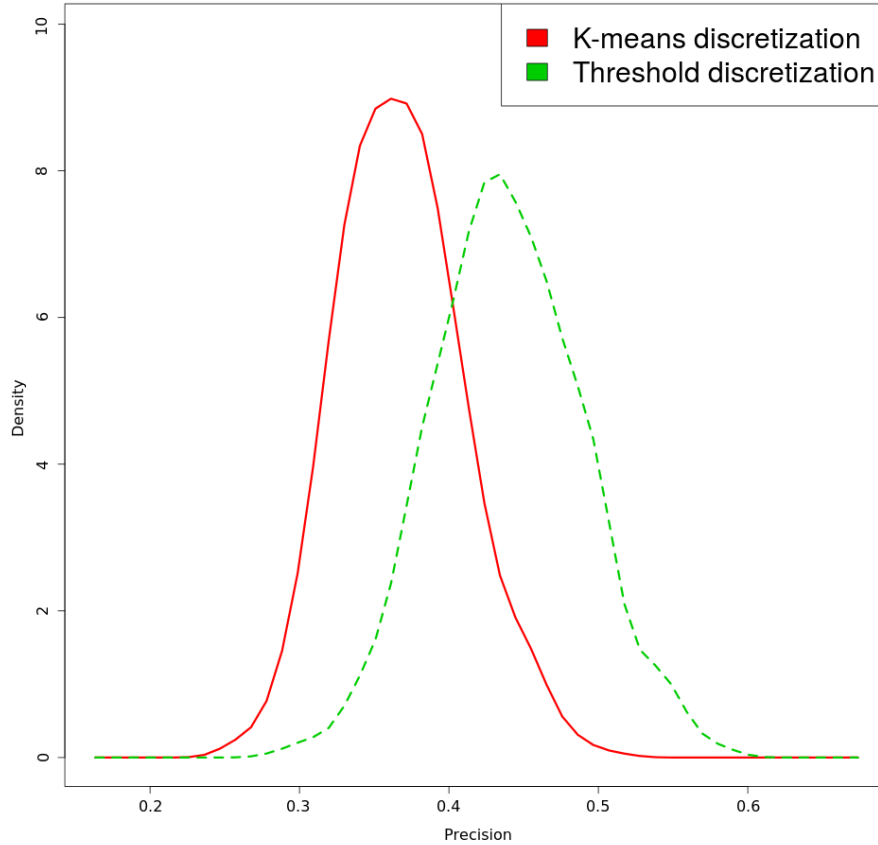

Figure 3: Precision repartition for threshold and k-means discretization

# Sign consistency

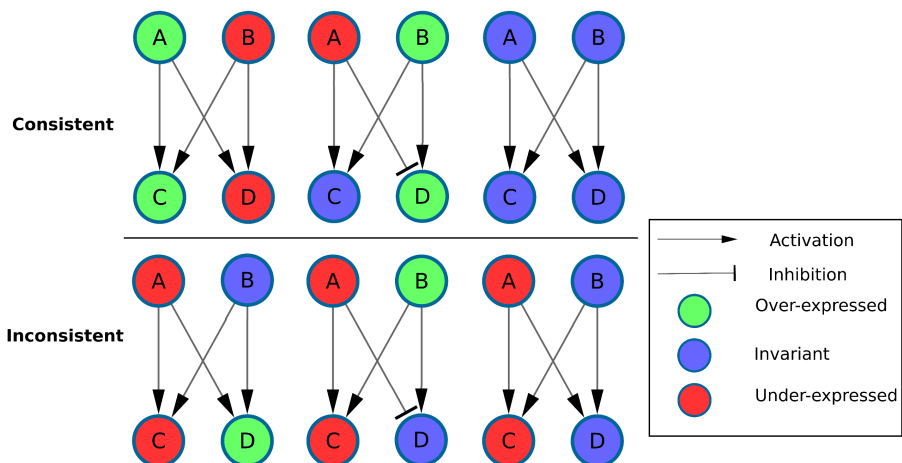

Figure 4: Example of consistent and inconsistent coloring models.

# Repairs

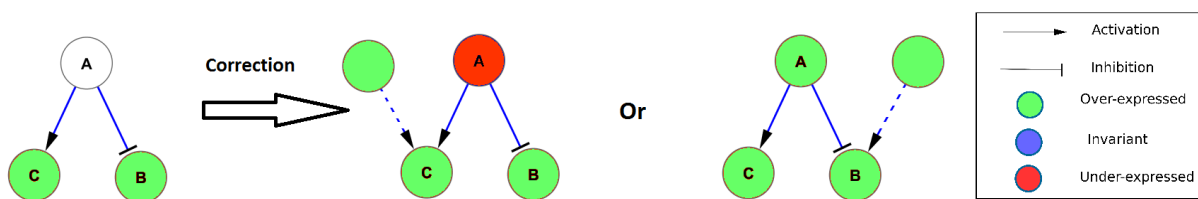

Figure 5: Example of inconsistency correction using 2 MCOS-repairs.

# Nodes perturbation

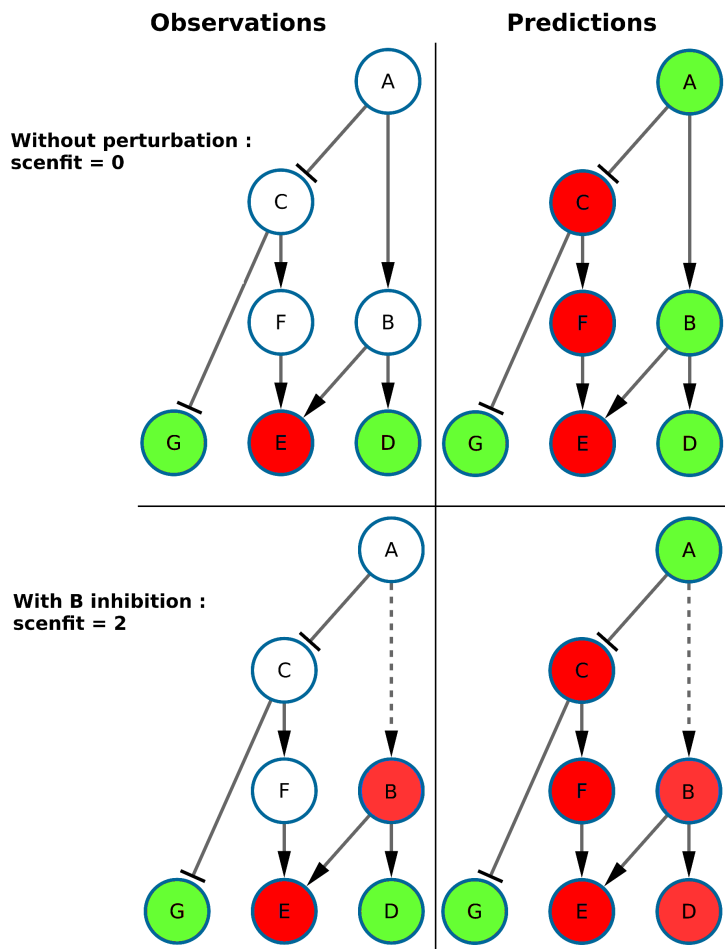

Figure 6: Example of a node perturbation scenario where node  $B$  is set to  $-$  and this fact generates a SCENFIT score of 2.

# Random forest

We show the result obtained with a random forest analysis. The principal couples found by this approach are nearly the same as with the frequency analysis (Figure 7). Nonetheless, this approach identifies the couples, without taking account if they are specific to a group or another. In the case of our frequency analysis, we decided to only select the couples with a better frequency for MPC.

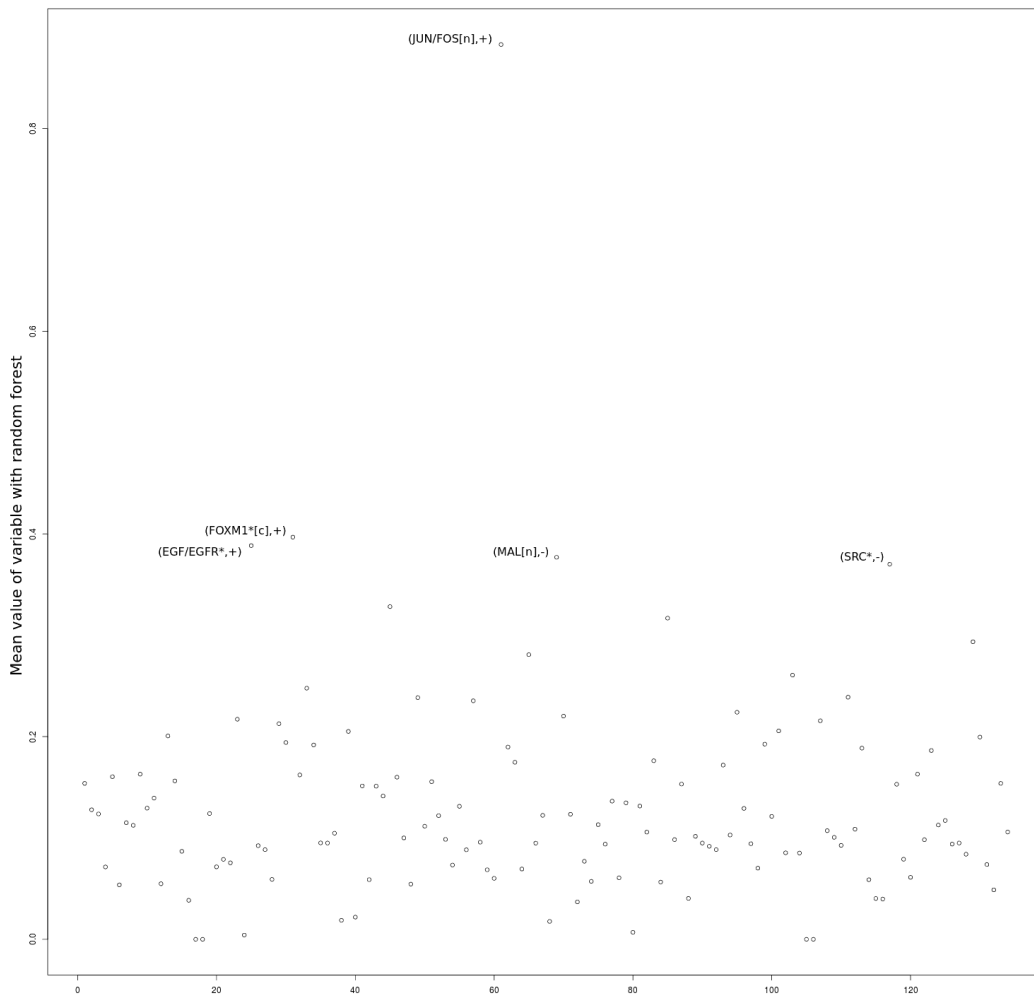

Figure 7: Result for random Forest.

# Full list of predictions

In Table 2 we show the prediction of the activity (increase or decrease) of 596 nodes in the graph (proteins, protein-complexes and cellular processes), as well as their frequency score across the 602 MC profiles compared to the NPC profiles. The [m] in a protein name means it is located in the plasma membrane, [n] for the nuclei, and [c] for the cytoplasm. Finally, the asterix in a protein name means that it appears phosphorylated.

Table 2: Results of the frequency analysis

| Predicted node                                                      | Sign | $FS_{NPC}$   | $FS_{MC}$     | p.value (fisher) |
|---------------------------------------------------------------------|------|--------------|---------------|------------------|
| JUN/FOS[n]                                                          | -    | 0,4444444444 | 0,9568106 312 | 2,65E-005        |
| FOXM1C*[c]                                                          | -    | 0,2222222222 | 0,7740863787  | 0,000796623      |
| STAT6*[c]                                                           | -    | 0,2222222222 | 0,7641196013  | 0,0010457727     |
| MAL[n]                                                              | +    | 0,5555555556 | 0,1013289037  | 0,0011370116     |
| Src*                                                                | +    | 0,5555555556 | 0,9352159468  | 0,0020781468     |
| EGF/EGFR*                                                           | +    | 0,5555555556 | 0,9352159468  | 0,0020781468     |
| RB1/E2F1-3/DP[n]                                                    | +    | 0,3333333333 | 0,7990033223  | 0,0035098488     |
| NFAT1[n]                                                            | -    | 0,4444444444 | 0,865448505   | 0,0039262109     |
| IL23/IL23R/JAK2/TYK2*[m]                                            | -    | 0,4444444444 | 0,865448505   | 0,0039262109     |
| STAT6*[c]                                                           | +    | 0,7777777778 | 0,3023255814  | 0,004900412      |
| IL12A/IL12B/IL12R1/IL12R2/TYK2/JAK2*[m]                             | -    | 0,5555555556 | 0,8887043189  | 0,0134469369     |
| Src*                                                                | -    | 0,7777777778 | 0,3571428571  | 0,0134575472     |
| IL23/IL23R/JAK2/TYK2*[m]                                            | +    | 0,5555555556 | 0,2026578073  | 0,0221351528     |
| STAT3*[n]                                                           | -    | 0,3333333333 | 0,707641196   | 0,0235380439     |
| G1/S _transition_of _mitotic _cell _cycle                           | +    | 0,6666666667 | 0,2990033223  | 0,026272743      |
| JUN/FOS*[n]                                                         | +    | 0,5555555556 | 0,8637873754  | 0,0263899967     |
| JUN/FOS[n]                                                          | +    | 0,5555555556 | 0,2176079734  | 0,0295514303     |
| IL12A/IL12B/IL12R1/IL12R2/TYK2/JAK2*[m]                             | +    | 0,5555555556 | 0,2176079734  | 0,0295514303     |
| STAT3*                                                              | +    | 0,7777777778 | 0,3787375415  | 0,0312675017     |
| IL4/IL4R /JAK1/IL2RG/JAK3                                           | +    | 0,8888888889 | 0,5049833887  | 0,0380656569     |
| MAL[n]                                                              | -    | 0,7777777778 | 0,9667774086  | 0,0382477952     |
| positive _regulation_of _NF.kappaB _transcription _factor _activity | -    | 0,4444444444 | 0,7607973422  | 0,0430785009     |
| MKK3-MKK6-active*                                                   | -    | 0,7777777778 | 0,9634551495  | 0,0449978118     |
| Jun[n]                                                              | +    | 0,5555555556 | 0,8388704319  | 0,0454802151     |
| Akt1*                                                               | +    | 0,8888888889 | 0,5465116279  | 0,0466814274     |
| ATF2*[n]                                                            | +    | 0,4444444444 | 0,7392026578  | 0,0602829283     |
| ATF2*                                                               | +    | 0,6666666667 | 0,8970099668  | 0,0605037172     |
| JNK family-active*                                                  | -    | 0,6666666667 | 0,8936877076  | 0,0653292552     |
| IL4/IL4R /JAK1/IL2RG/JAK3                                           | -    | 0,7777777778 | 0,9518272425  | 0,0718166928     |
| CaM/Ca2 /Calcineurin A alpha-beta B1*                               | -    | 0,6666666667 | 0,8887043189  | 0,0729213452     |
| MK14*                                                               | +    | 0,6666666667 | 0,8870431894  | 0,0755452162     |
| PTP1B                                                               | -    | 0,3333333333 | 0,6445182724  | 0,0772799188     |
| Akt1*                                                               | -    | 0,5555555556 | 0,8073089701  | 0,0794519114     |
| JUN/JUND*[n]                                                        | +    | 0,8888888889 | 0,5548172757  | 0,0851744548     |
| FOXA1[n]                                                            | -    | 0,2222222222 | 0,5548172757  | 0,0860083332     |
| MKK3-MKK6-active*                                                   | +    | 0,8888888889 | 0,5813953488  | 0,08831995       |
| RHOA*                                                               | -    | 0,6666666667 | 0,8687707641  | 0,1073656048     |
| G1/S _transition_of _mitotic _cell _cycle                           | -    | 0,5555555556 | 0,780730897   | 0,1168149651     |
| PI3K*                                                               | -    | 0,5555555556 | 0,780730897   | 0,1168149651     |
| CaM/Ca2 /Calcineurin A alpha-beta B1*                               | +    | 0,4444444444 | 0,219269103   | 0,1168149651     |
| STAT3*                                                              | -    | 0,7777777778 | 0,9352159468  | 0,1172093643     |
| Cyclin D                                                            | +    | 0,8888888889 | 0,9867109635  | 0,1257988695     |
| JUN/FOS*[n]                                                         | +    | 0,4444444444 | 0,7059800664  | 0,1350528502     |
| IFN-gamma/IRF1                                                      | +    | 0,7777777778 | 0,926910299   | 0,1423195134     |
| p38alpha-beta-active*                                               | +    | 0,4444444444 | 0,6893687708  | 0,1481743371     |
| ATF2/JUN*[n]                                                        | +    | 0,6666666667 | 0,8471760797  | 0,1513916339     |
| JNK family-active*                                                  | -    | 0,5555555556 | 0,3205980066  | 0,1579377713     |
| STAT4*[n]                                                           | -    | 0,3333333333 | 0,6129568106  | 0,1646594722     |
| TAK1/TAB family*                                                    | +    | 0,7777777778 | 0,915282392   | 0,1794778162     |
| MAPKKK _cascade                                                     | -    | 0,6666666667 | 0,8189368771  | 0,2176078177     |
| MKK6*                                                               | -    | 0,7777777778 | 0,9019933555  | 0,2240161444     |
| Jun*[n]                                                             | -    | 0,5555555556 | 0,7624584718  | 0,2294440408     |
| STAT1 (dimer)*[n]                                                   | -    | 0,7777777778 | 0,8986710963  | 0,2353951054     |
| NFAT1[n]                                                            | +    | 0,4444444444 | 0,2508305648  | 0,241536935      |
| EGF/EGFR*                                                           | -    | 0,5555555556 | 0,7325581395  | 0,2612443723     |
| RHOA*                                                               | -    | 0,7777777778 | 0,8887043189  | 0,2699151506     |

| Predicted node                                                  | Sign | $FS_{NPC}$   | $FS_{MC}$    | p.value (fisher) |
|-----------------------------------------------------------------|------|--------------|--------------|------------------|
| IL2R/IL2/JAK1/LCK/JAK3/SHC1/GRB2/SOS1/GAB2/PTN11/PK3CA/P85A*[m] | -    | 0,5555555556 | 0,7159468439 | 0,2854636694     |
| GRB2/SOS1/PTN11*                                                | -    | 0,4444444444 | 0,6511627907 | 0,2902056457     |
| Erk1-2-active*                                                  | -    | 0,4444444444 | 0,622923588  | 0,3109884105     |
| positive_regulation_of_NF.kappaB_transcription_factor_activity  | +    | 0,6666666667 | 0,4568106312 | 0,3139240743     |
| FOXM1C*[c]                                                      | +    | 0,6666666667 | 0,4584717608 | 0,3144645934     |
| PI3K*                                                           | +    | 0,6666666667 | 0,4617940199 | 0,315688483      |
| STAT1 (dimer)*[n]                                               | +    | 0,6666666667 | 0,4800664452 | 0,3257703828     |
| ATF2*[n]                                                        | -    | 0,5555555556 | 0,3936877076 | 0,329276166      |
| Jnk1*                                                           | -    | 0,8888888889 | 0,9568106312 | 0,336027101      |
| MEK1*                                                           | +    | 1            | 0,8488372093 | 0,3689753253     |
| IFN-gamma/IRF1                                                  | -    | 1            | 0,8504983389 | 0,3695842251     |
| p38alpha-beta-active*                                           | -    | 1            | 0,8156146179 | 0,3758997164     |
| CD40[m]                                                         | +    | 0,6666666667 | 0,8139534884 | 0,3811110637     |
| ATF2*                                                           | -    | 0,8888888889 | 0,73089701   | 0,4567676076     |
| beta catenin*[n]                                                | +    | 0,5555555556 | 0,696013289  | 0,4666566818     |
| IGF1                                                            | +    | 0,5555555556 | 0,6910299003 | 0,4699773265     |
| STAT5 (dimer)-active*[n]                                        | -    | 0,5555555556 | 0,6694352159 | 0,4889925336     |
| CREB1*[n]                                                       | -    | 0,4444444444 | 0,5996677741 | 0,4957307553     |
| TGFB/TGFBR2/TGFBR1/STRAP/SMAD7*[m]                              | +    | 0,4444444444 | 0,5897009967 | 0,4990576611     |
| beta catenin*[n]                                                | -    | 0,5555555556 | 0,6561461794 | 0,5040423859     |
| STAT3*[n]                                                       | +    | 0,3333333333 | 0,4916943522 | 0,5054664405     |
| PTP1B                                                           | +    | 0,4444444444 | 0,5747508306 | 0,506917695      |
| STAT5 (dimer)-active*[n]                                        | +    | 0,3333333333 | 0,4833887043 | 0,5073910055     |
| Erk1-2-active*                                                  | +    | 0,6666666667 | 0,5398671096 | 0,5183589723     |
| Akt1*                                                           | +    | 0,4444444444 | 0,5564784053 | 0,520916961      |
| CD40[m]                                                         | -    | 0,8888888889 | 0,7724252492 | 0,6917544772     |
| STAT4*[n]                                                       | +    | 0,5555555556 | 0,634551495  | 0,7309241973     |
| RHOA*                                                           | +    | 0,6666666667 | 0,5548172757 | 0,7378847373     |
| NF kappa B1 p50/RelA*[n]                                        | +    | 0,6666666667 | 0,5581395349 | 0,7379624924     |
| TGFB/TGFBR2/TGFBR1/STRAP/SMAD7*[m]                              | -    | 0,5555555556 | 0,450166113  | 0,7381429579     |
| MEK1*                                                           | -    | 0,6666666667 | 0,561461794  | 0,7381441077     |
| Jnk1*                                                           | +    | 0,6666666667 | 0,584717608  | 0,7423231901     |
| Akt1*                                                           | -    | 0,5555555556 | 0,4817275748 | 0,7448745865     |
| Jun*[n]                                                         | +    | 0,4444444444 | 0,3986710963 | 0,747312076      |
| JUN/FOS*[n]                                                     | -    | 0,4444444444 | 0,3986710963 | 0,747312076      |
| GLI2A*[n]                                                       | -    | 0,4444444444 | 0,5033222591 | 0,7510723201     |
| MAPKKK_cascade                                                  | +    | 0,7777777778 | 0,7707641196 | 1                |
| IGF1                                                            | -    | 0,4444444444 | 0,4700996678 | 1                |
| Jun                                                             | +    | 0,4444444444 | 0,4817275748 | 1                |
| Jun                                                             | -    | 0,8888888889 | 0,803986711  | 1                |
| Jun[n]                                                          | -    | 0,4444444444 | 0,4534883721 | 1                |
| CREB1*[n]                                                       | +    | 0,5555555556 | 0,5581395349 | 1                |
| MKK6*                                                           | +    | 1            | 0,9485049834 | 1                |
| FOXA1[n]                                                        | +    | 0,5555555556 | 0,5265780731 | 1                |
| GLI2A*[n]                                                       | +    | 0,6666666667 | 0,6129568106 | 1                |
| MK14*                                                           | -    | 0,5555555556 | 0,5431893688 | 1                |
| TAK1/TAB family*                                                | -    | 0,5555555556 | 0,5913621262 | 1                |
| JUN/FOS*[n]                                                     | -    | 0,5555555556 | 0,5448504983 | 1                |
| MYC/MAX/ZBTB17[n]                                               | +    | 0,5555555556 | 0,5913621262 | 1                |
| MYC/MAX/ZBTB17[n]                                               | -    | 0,5555555556 | 0,5531561462 | 1                |
| IL2R/IL2/JAK1/LCK/JAK3/SHC1/GRB2/SOS1/GAB2/PTN11/PK3CA/P85A*[m] | +    | 0,7777777778 | 0,7209302326 | 1                |
| ATF2/JUN*[n]                                                    | +    | 0,3333333333 | 0,3089700997 | 1                |
| RB1/E2F1-3/DP[n]                                                | -    | 0,4444444444 | 0,4451827243 | 1                |
| JUN/JUND*[n]                                                    | -    | 1            | 0,9551495017 | 1                |
| CEBP[n]                                                         | +    | 0,4444444444 | 0,4401993355 | 1                |
| CEBP[n]                                                         | -    | 0,6666666667 | 0,6677740864 | 1                |
| NF kappa B1 p50/RelA*[n]                                        | -    | 0,6666666667 | 0,6079734219 | 1                |
| Cyclin D                                                        | -    | 1            | 0,9468438538 | 1                |
| RHOA*                                                           | +    | 0,8888888889 | 0,8172757475 | 1                |
| GRB2/SOS1/PTN11*                                                | +    | 0,8888888889 | 0,8222591362 | 1                |
| CDK4-6/Cyclin D                                                 | +    | 1            | 0,9966777409 | 1                |
| CDK4-6/Cyclin D                                                 | -    | 1            | 0,9634551495 | 1                |



## Example of coloration of JUN/FOS[n] subgraph

In order to predict the sign of each node of the graph, we used the observed data. Due to the consistency rules, each variant sign has to be explained by a predecessor (Figure 8). that correspond to two different patient expression profiles, will predict an inhibition of JUN/FOS[n] with the sign consistency approach.

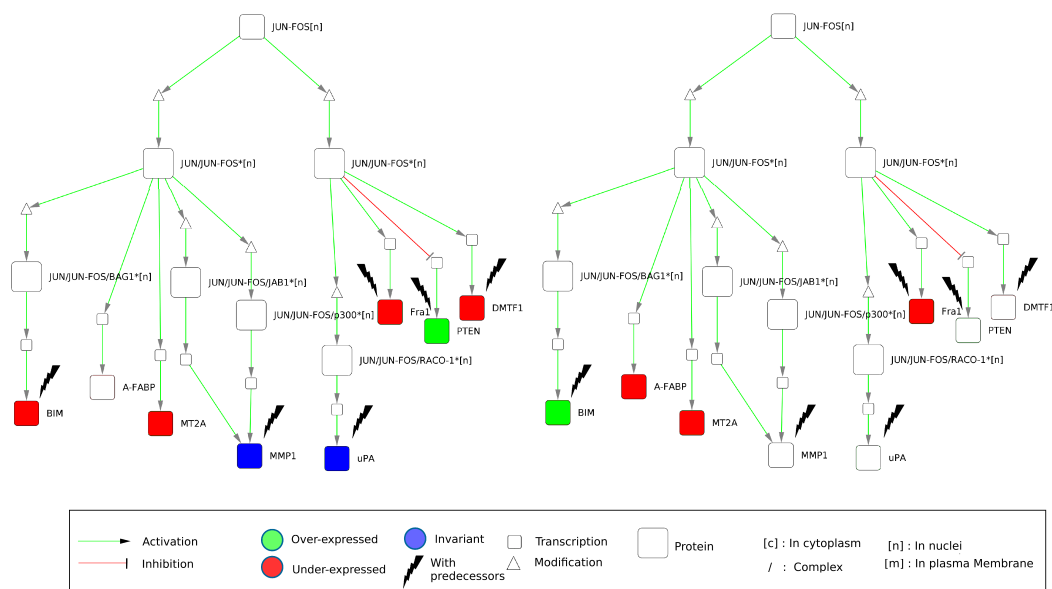

Figure 8: Subgraph from JUN/FOS[n] to variant genes with two examples of data coloring obtained from specific MM gene expression profiles. The graph is the same for each patient while the coloration is specific for each.

## FOXM1 expression and survival

In order to analyze the correlation between *FOXM1* expression and the overall survival (OS), we selected the patients in the last quartile of *FOXM1* expression (Q4), with the highest level of expression and compared this group to the other quartiles (Figure 9). A log-rank test between these groups gave us a p-value <0.0001 allowing us to conclude to a correlation between better survival and low *FOXM1* expression.

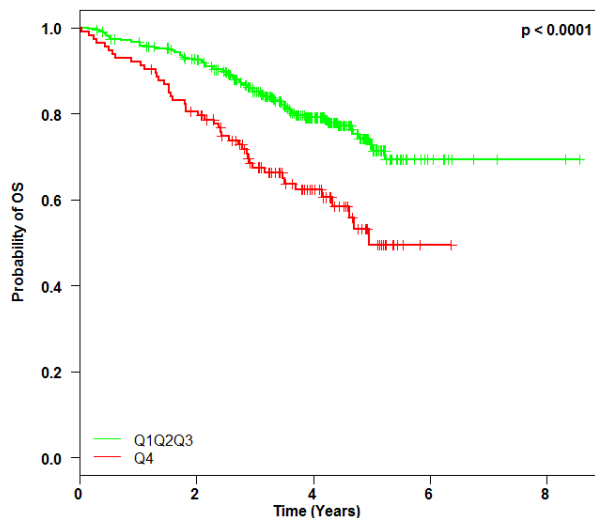

Figure 9: Overall survival (OS) in patients depending of *FOXM1* expression

## Selected prognostic factors

In figure 10, we present the survival curves based on the couples identified as informative prognostic factors.

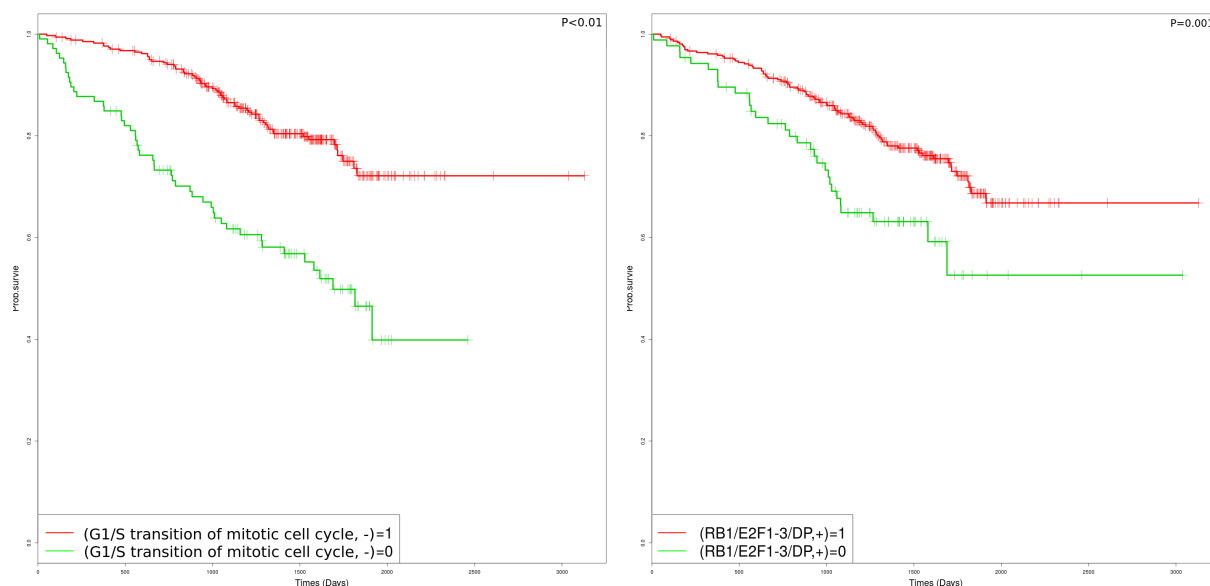

Figure 10: Overall survival (OS) in patients depending of inhibition of “G1/S transition of mitotic cell cycle” node (left) and inhibition of RB1/E2F1-3/DP[n] (right)

## FOXM1C\*[c] predictions and perturbation

In table 3, for FOXM1C\*[c] and for 10 MC patients we indicate the prediction of the inhibition of this node (column Prediction(FOXM1C\*[c],-), 1 if predicted, 0 if not) and the impact of the activation of FOXM1C\*[c] (column Perturbation(FOXM1C\*[c],+), 1 if the perturbation is in the 10% best perturbation for the dataset, 0 if not). The last column shows patients with both conditions : inhibition prediction of FOXM1C\*[c] and activation of FOXM1C\*[c] with a top-ranked SCENFIT scores. The first lines (sum and frequency) indicate respectively the sum and the frequency for each column for all MC patients.

Table 3: Comparison between predictions and perturbation for FOXM1 for an example of 10 MC patients

| Patient          | Prediction(FOXM1C*[c],-) | Perturbation(FOXM1C*[c],+) | Prediction(FOXM1C*[c],-) $\wedge$ Perturbation(FOXM1C*[c],+) |
|------------------|--------------------------|----------------------------|--------------------------------------------------------------|
| <b>Sum</b>       | <b>466</b>               | <b>219</b>                 | <b>212</b>                                                   |
| <b>Frequency</b> | <b>0.774</b>             | <b>0.364</b>               | <b>0.352</b>                                                 |
| MC1              | 1                        | 1                          | 1                                                            |
| MC2              | 0                        | 0                          | 0                                                            |
| MC3              | 0                        | 0                          | 0                                                            |
| MC4              | 1                        | 1                          | 1                                                            |
| MC5              | 1                        | 0                          | 0                                                            |
| MC6              | 1                        | 1                          | 1                                                            |
| MC7              | 1                        | 0                          | 0                                                            |
| MC8              | 1                        | 1                          | 1                                                            |
| MC9              | 0                        | 0                          | 0                                                            |
| MC10             | 1                        | 0                          | 0                                                            |
